# Supplementary material for: Enhanced Chlorophyll Degradation Triggers the Pod Degreening of “Golden Hook,” a Special Ecotype in Common Bean (Phaseolus vulgaris L.)
Source: Front Genet. 2020 Oct 6;11:570816. doi: 10.3389/fgene.2020.570816 (PMC7573562; doi:10.3389/fgene.2020.570816)
Supplement: TABLE S1 — Statistics for the number of clean data. [file Table_1.xlsx]

## Sheet: Sheet1
Table S1. Statistics for the number of clean data
Sample	clean reads	cleans bases	Q30	GC content
YP-2	5.04076e+07	7561146800	92.5517	44.6783
YP-5	48995896	7349384400	92.5417	44.6367
YP-10	5.41703e+07	8125545700	92.1783	44.73
GP-2	5.94453e+07	8916791500	92.46	44.8817
GP-5	51527246	7729086900	92.0933	44.6333
GP-10	49269434	7390415100	92.6667	44.6883
