# Supplementary material for: Enhanced Chlorophyll Degradation Triggers the Pod Degreening of “Golden Hook,” a Special Ecotype in Common Bean (Phaseolus vulgaris L.)
Source: Front Genet. 2020 Oct 6;11:570816. doi: 10.3389/fgene.2020.570816 (PMC7573562; doi:10.3389/fgene.2020.570816)
Supplement: TABLE S2 — List of genes and primers for RT-qPCR. [file Table_2.xlsx]

## Sheet: Sheet1
Table S2. List of genes and primers for RT-qPCR
	Gene	Forward primer	Reverse primer
HEMA1	Phvul.002G216100	TTGCCATCTCAGAGGATCG	GAACAGCGGCTTCTTCTATG
HEMA2	Phvul.008G185100	AAAGTTGGAGGCTTTGTTGCT	CTCTATGAGTCTGAACAAGTGTCTT
HEMC	Phvul.002G034500	ATGAAACAAGACTAGCAGTGGT	AGCAACCAATCCTCTAAACAAAC
HEME1	Phvul.001G248800	TTGGTGACATGGCAGAAG	TTGAAGGATGTGATATGGTTAGG
HEME2	Phvul.005G065500	AGAGAGAGGTCAGAGACAACT	GCAGGAAGTGGTGTAAGGA
HEMF	Phvul.008G289900	TCACAGAACAACAGAAAGCATG	TGATCATATTCCCACCGAGAAG
CHLI1	Phvul.003G057600	CCCTTCTCCATTCTTCAATCC	TTCCCTTGACGGCAGTT
CHLI2	Phvul.006G178400	CTGCAAGGAGAGGAACTTTCT	GCCGCACACTCTATCTTCT
CAO	Phvul.008G167850	TGGATGTATATCAAGCCTGGA	GGAGGAGCATGATTGTAAGC
DVR	Phvul.006G161600	TTCCTTAACCTTCTCTTCGGAC	TCTTAACCAACTCTCTCACCAC
POR1	Phvul.005G083700	ACACCACTTCTACTTACTTCACT	AAGAAGCAGGAACAAGAGAA
POR2	Phvul.011G148900	AACTCCTCTTGTCTTGATGACTAC	AGAAGGTCCAAATGCTGAATTAAG
CLH1	Phvul.004G154100	CTTTGCTTCCTGAGAAAGTTGA	ACAGGGTCTATGCCTATAAGTG
CLH2	Phvul.007G278100	ATAGGAGTGGACCCAGTTGAT	GAGTGAGGAACATAGGTCAGAAC
PAO	Phvul.011G086700	CAAGATGGATTCTCGTGGTTCATG	ATTTGGCACTGATCTTAGGGTTC
RCCR	Phvul.008G280300	TGACGGAGAGAGTAAAACAGAG	TGGTCGCAGATCATCACTT
SGR1	Phvul.002G153100	CTCACCTTGGCAATTTCTCAAACC	GACATCTTTCCCTTCACCTTCTTC
SGR2	Phvul.009G132100	GAACGAACCAAACCAACAACA	ACAGTGCTGCTCTTCATCTT
CESA2	Phvul.004G093300	ATCATCATCACATGGCTGAGG	CTGATGGTGTGTGGACTGAA
CESA3	Phvul.005G022100	TGGATAGAGCTTAGTACGAGTCT	CATCGCAAGCAATGAAGGAA
CESA4	Phvul.009G242700	GAGATTGGATATAAGGAAAATGGAGAAG	ATTGAGGACAGCTCTGGTTC
CSLE6	Phvul.008G279800	CCAAGAGAAAAGAAGTTGATGAGATC	ACACTCCTCTGAATCTTCCTT
CESA7	Phvul.009G205100	CGAGTGCATCCATATCCAATG	CTTCCAGTCCTCCATCCTT
	Phvul.011G145900	CAGGAAGATGTTCCCTGTTAGG	GCAGCAGCATGAGATAAGAGA
	Phvul.006G133700	GGGTAGGAAATACTGCGGAT	ATCTGAACAACTGTGGCATTC
	Phvul.001G112700	CACATGCCAGCTTACTTCAATT	GCCAGTTATAAGTTCGTGGTTAG
	Phvul.011G200700	GAACCCTACACAGTGAGTTG	CTATCCAATGACATGACAGTGAT
Actin-11		TGCATACGTTGGTGATGAGG	AGCCTTGGGGTTAAGAGGAG
