# Supplementary material for: Enhanced Chlorophyll Degradation Triggers the Pod Degreening of “Golden Hook,” a Special Ecotype in Common Bean (Phaseolus vulgaris L.)
Source: Front Genet. 2020 Oct 6;11:570816. doi: 10.3389/fgene.2020.570816 (PMC7573562; doi:10.3389/fgene.2020.570816)
Supplement: TABLE S3 — Statistics of SNP variants of the genes for chlorophyll degradation. [file Table_3.xlsx]

## Sheet: Sheet1
Table S3. Statistics of SNP variants of the genes for chlorophyll degradation
GeneName		missense_variant	synonymous_variant	intron_variant	3_prime_UTR_variant	5_prime_UTR_variant	upstream_gene_variant	downstream_gene_variant
CLH1	YP	5	5	15	0	1	123	107
Phvul.004G154100	GP	0	0	3	0	0	12	114
	M729Y	5	5	15	0	1	129	94
	M729G	0	0	3	0	0	12	113
	M693	0	0	3	0	0	12	123
	M756	0	0	2	0	0	12	101
CLH2	YP	0	6	33	8	0	40	101
Phvul.007G278100	GP	0	6	16	9	0	37	64
	M729Y	0	6	34	10	0	9	88
	M729G	0	60	17	9	0	0	57
	M693	0	3	16	0	0	19	52
	M756	0	6	17	9	0	20	130
PAO	YP	1	1	2	0	0	1	1
Phvul.011G086700	GP	1	1	2	0	0	1	1
	M729Y	1	1	0	0	0	1	0
	M729G	1	1	2	0	0	1	0
	M693	1	1	2	0	0	1	0
	M756	1	1	2	0	0	1	0
RCCR	YP	0	0	8	0	0	29	166
Phvul.008G280300	GP	0	0	7	0	0	23	167
	M729Y	0	0	0	0	0	0	0
	M729G	0	0	13	0	0	22	165
	M693	0	0	0	0	0	31	167
	M756	0	0	1	0	0	29	165
SGR1	YP	0	0	1	0	0	6	34
Phvul.009G132100	GP	0	0	1	0	0	6	34
	M729Y	0	0	1	0	0	5	24
	M729G	0	0	1	0	0	4	20
	M693	0	0	1	0	0	5	33
	M756	0	0	1	0	0	6	34
SGR2	YP	0	2	2	0	1	27	24
Phvul.002G153100	GP	0	0	0	0	0	1	0
	M729Y	0	0	0	0	0	1	0
	M729G	0	0	0	0	0	1	0
	M693	0	0	0	0	0	1	0
	M756	0	0	0	0	0	1	0
